# Supplementary material
Source: HighWire-hosted journal article supplement (https://cmaj.ca/highwire/filestream/81281/field_highwire_adjunct_files/6/211881-res-7-at.pdf)
Supplement: 211881-res-7-at.pdf [file 211881-res-7-at.pdf]

A)

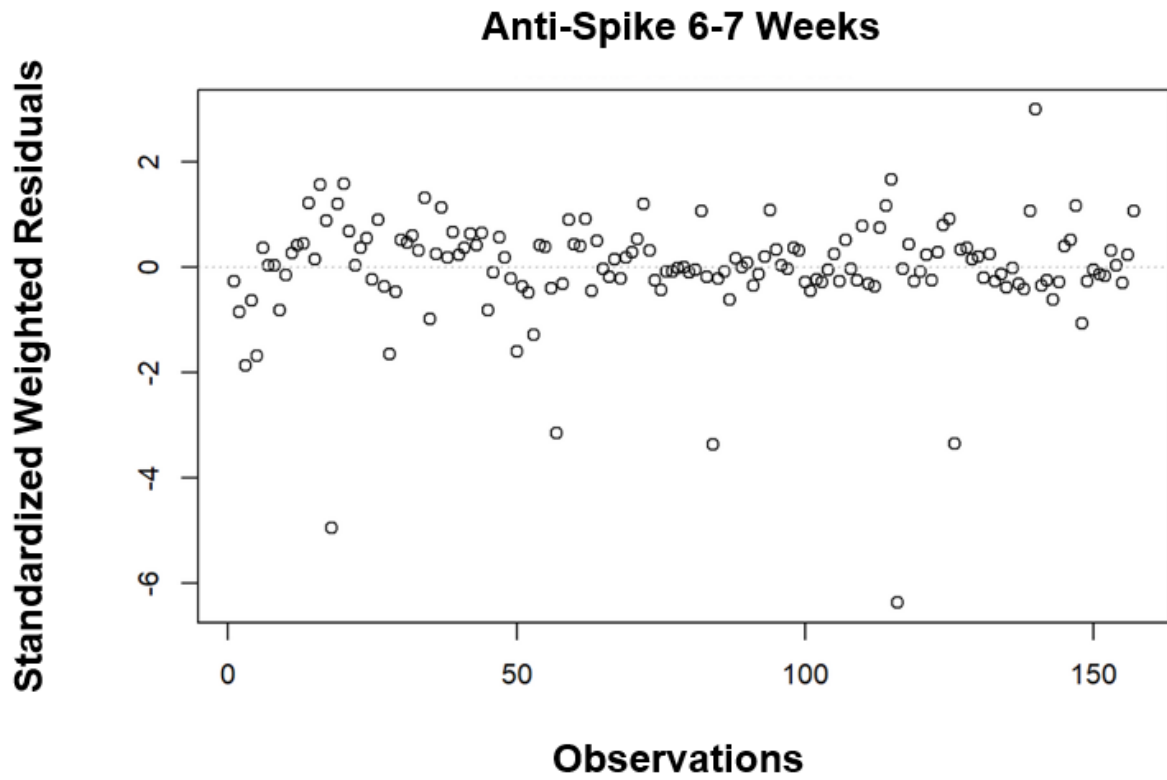

B)

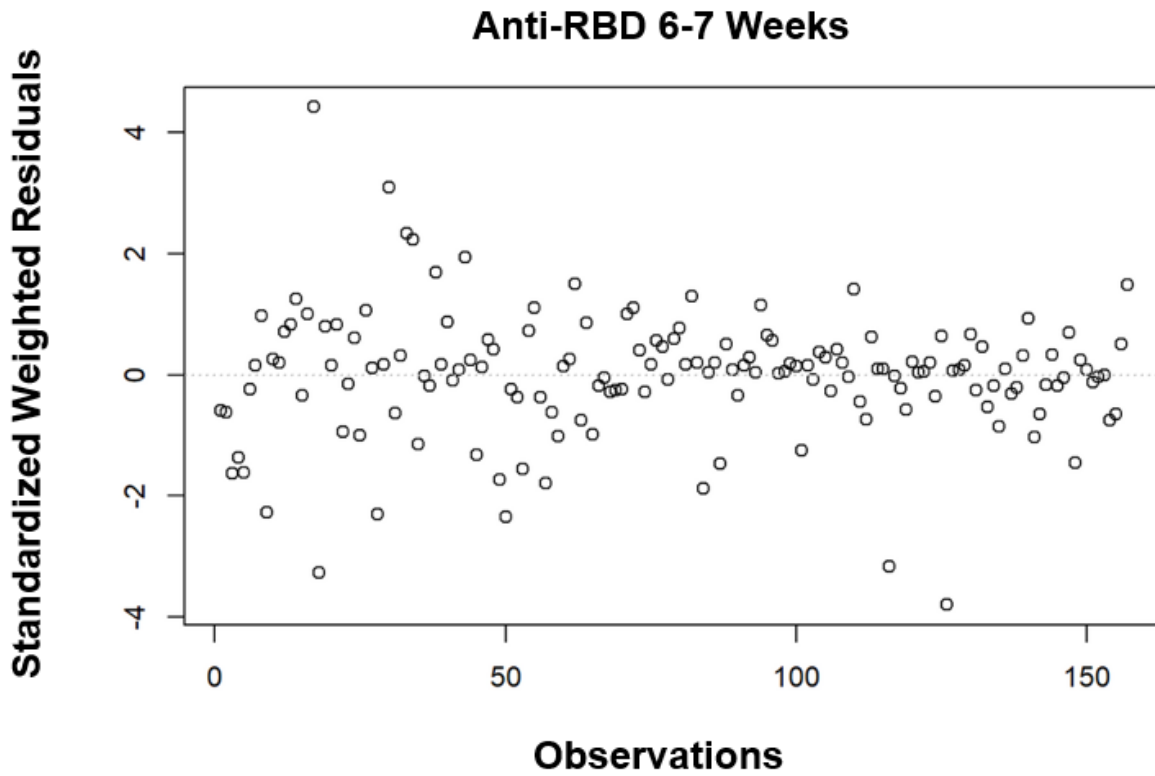

C)

### Anti-Spike 12 Weeks

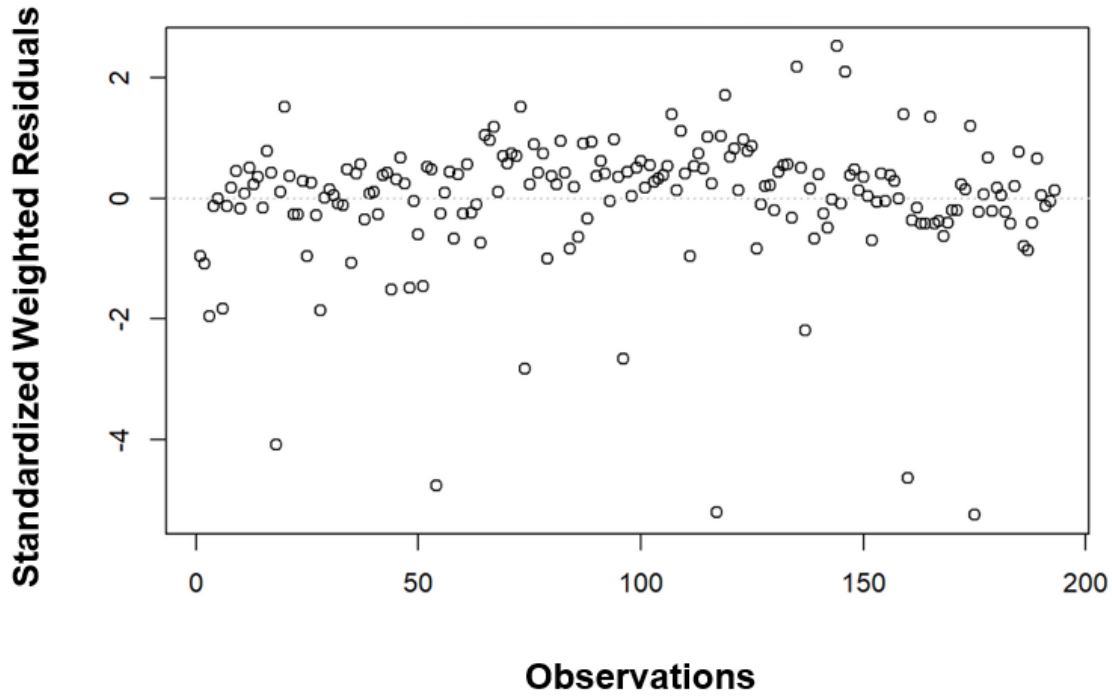

D)

### Anti-RBD 12 Weeks

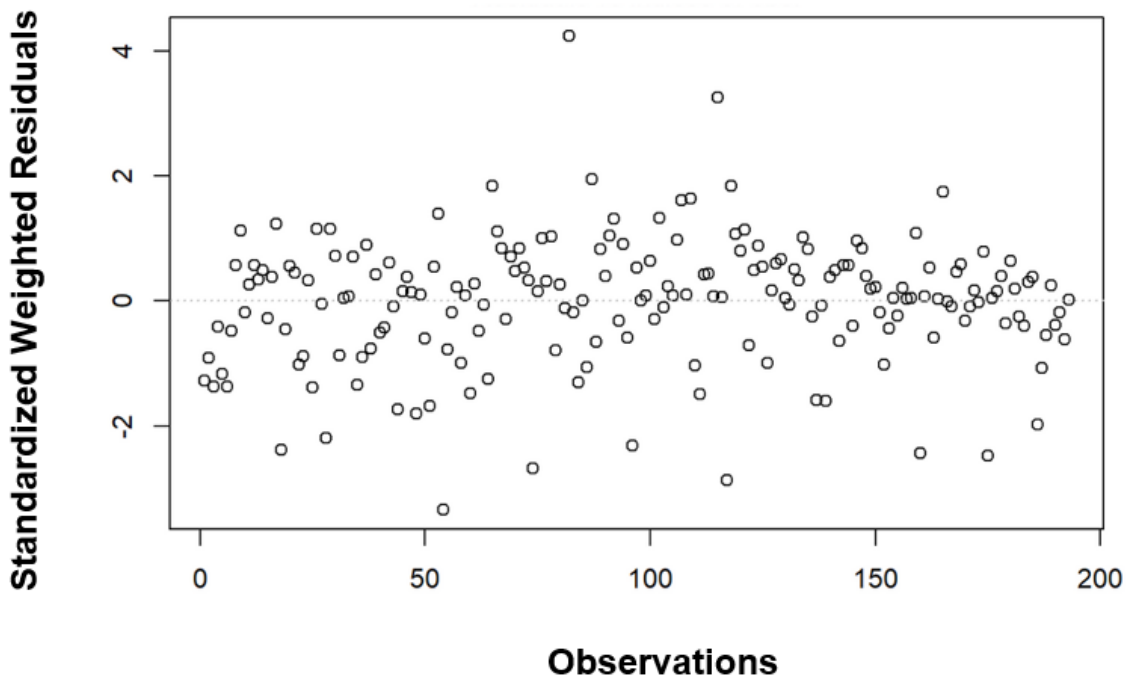

**Supplementary Appendix 7:** Standardized weighted residuals in multivariable  $\beta$ -regression models versus number of observations for (A) anti-Spike at 6-7 weeks (B) anti-RBD at 6-7 weeks (C) anti-Spike at 12 weeks, and (D) anti-RBD at 12 weeks.
